# Supplementary material
Source: publisher figshare collection journal article supplement (https://karger.figshare.com/ndownloader/files/12581588)
Supplement: Supplementary file 1 [file 12581588]

**Supplemental Materials. Bland-Altman plots for comparisons between the RunScribeTM and Motion Capture system.**

Maximum Pronation Velocity

Contact Time

Cycle Time

Pronation Excursion
